# Supplementary material for: Age and Sex as Determinants of Acute Domoic Acid Toxicity in a Mouse Model
Source: MDPI journal article supplement (doi:10.3390/toxins15040259), 2023-04-01
Supplement: s1 [file s1]

# Age and Sex as Determinants of Acute Domoic Acid Toxicity in a Mouse Model

**Table S1.** Estimated hazard ratios (HRs) and *p*-values associated with variables included in each Cox proportional hazard (CPH) regression model for clonic-tonic convulsions \* *p* <0.05.

| Models and model variables | Concordance | Estimated HRs     | <i>p</i> -values |
|----------------------------|-------------|-------------------|------------------|
| Additive                   | 91%         |                   |                  |
| Dose                       |             | 10.0 [1.9, 52]    | 0.0062 *         |
| Sex                        |             | 0.29 [0.31, 2.75] | 0.28             |
| Single-variable dose       | 90%         |                   |                  |
| Dose                       |             | 16.3 [2.9, 90.4]  | 0.0015           |
| Single-variable sex        | 72%         |                   |                  |
| Sex                        |             | 0.12 [0.015, 1.0] | 0.050            |

**Table S2.** Likelihood ratio test (LRT) *p*-values comparing nested single-variable CPH model fit to additive multivariable CPH model fit for clonic-tonic convulsions \*\*\* *p* <0.0005.

| Full model | Nested model | LRT <i>p</i> -values comparing full model to nested model |
|------------|--------------|-----------------------------------------------------------|
| Dose + Sex | Dose         | 0.24                                                      |
| Dose + Sex | Sex          | 0.00020 ***                                               |

**Table S3.** Estimated HRs and *p*-values associated with variables included in each CPH regression model for hindlimb tremors  
 \* *p* <0.05, \*\* *p* <0.005, \*\*\* *p* <0.0005.

| Models and model variables | Concordance | Estimated HRs       | <i>p</i> -values |
|----------------------------|-------------|---------------------|------------------|
| Interaction                |             |                     |                  |
| Dose * age + sex           | 84.5%       |                     |                  |
| Dose                       |             | 10.0 [2.0, 50.0]    | 0.0053 *         |
| Age                        |             | 36.0 [0.84, 1540.1] | 0.616            |
| Sex                        |             | 0.31 [0.11, 0.87]   | 0.026 *          |
| Dose:age                   |             | 0.29 [0.051, 1.65]  | 0.16             |
| Dose * sex + age           | 84.9%       |                     |                  |
| Dose                       |             | 3.6 [1.81, 7.0]     | 0.00024 ***      |
| Age                        |             | 3.1 [1.3, 7.2]      | 0.011 *          |
| Sex                        |             | 0.18 [0.0081, 3.81] | 0.27             |
| Dose:sex                   |             | 1.37 [0.23, 8.065]  | 0.73             |
| Sex * age + dose           | 85.1%       |                     |                  |
| Dose                       |             | 3.72 [2.00, 7.00]   | 3.9e-5 ***       |
| Age                        |             | 2.83 [1.10, 7.25]   | 0.030 *          |
| Sex                        |             | 0.21 [0.025, 1.71]  | 0.14             |
| Sex:age                    |             | 1.61 [0.15, 17.44]  | 0.70             |
| Additive                   |             |                     |                  |
| Dose + age + sex           | 85.3%       |                     |                  |
| Dose                       |             | 3.74 [2.00, 6.99]   | 3.6e-5 ***       |
| Age                        |             | 3.07 [1.30, 7.24]   | 0.010 *          |
| Sex                        |             | 0.29 [0.11, 0.81]   | 0.019 *          |
| Dose + age                 | 83.8%       |                     |                  |
| Dose                       |             | 1.57 [2.47, 9.26]   | 3.4e-6 ***       |
| Age                        |             | 2.85 [1.21, 6.68]   | 0.016 *          |
| Dose + sex                 | 82.1%       |                     |                  |
| Dose                       |             | 1.23 [1.83, 6.45]   | 0.00012 ***      |
| Sex                        |             | 0.32 [0.11, 0.88]   | 0.028 *          |
| Sex + age                  | 72.0%       |                     |                  |
| Sex                        |             | 0.20 [0.75, 0.54]   | 0.0015 **        |
| Age                        |             | 2.41 [1.03, 5.64]   | 0.043 *          |
| Single-variable            |             |                     |                  |
| Dose                       | 79.1%       |                     |                  |
| Dose                       |             | 4.43 [2.30, 8.53]   | 8.6e-6 ***       |
| Age                        | 60.1%       |                     |                  |
| Age                        |             | 2.29 [0.98, 5.36]   | 0.055            |
| Sex                        | 67.1%       |                     |                  |
| Sex                        |             | 0.21 [0.078, 0.56]  | 0.0018 **        |

**Table S4.** Likelihood ratio test  $p$ -values comparing nested single-variable CPH model fit to additive multivariable CPH model fit for hindlimb tremors \*  $p < 0.05$ , \*\*  $p < 0.005$ , \*\*\*  $p < 0.0005$ .

| Full model       | Nested model | LRT $p$ -values comparing full model to nested model |
|------------------|--------------|------------------------------------------------------|
| Dose + Age       | Dose         | 0.013 *                                              |
| Dose + Sex       | Dose         | 0.018 *                                              |
| Age + Dose       | Age          | 1.3e <sup>-7</sup> ***                               |
| Age + Sex        | Age          | 0.00036 ***                                          |
| Sex + Dose       | Sex          | 1.4e <sup>-5</sup> ***                               |
| Sex + Age        | Sex          | 0.036 *                                              |
| Dose + Age + Sex | Dose + Sex   | 0.0078 **                                            |
| Dose + Age + Sex | Dose + Age   | 0.011 *                                              |
| Dose + Age + Sex | Age + Sex    | 3.4e <sup>-6</sup> ***                               |

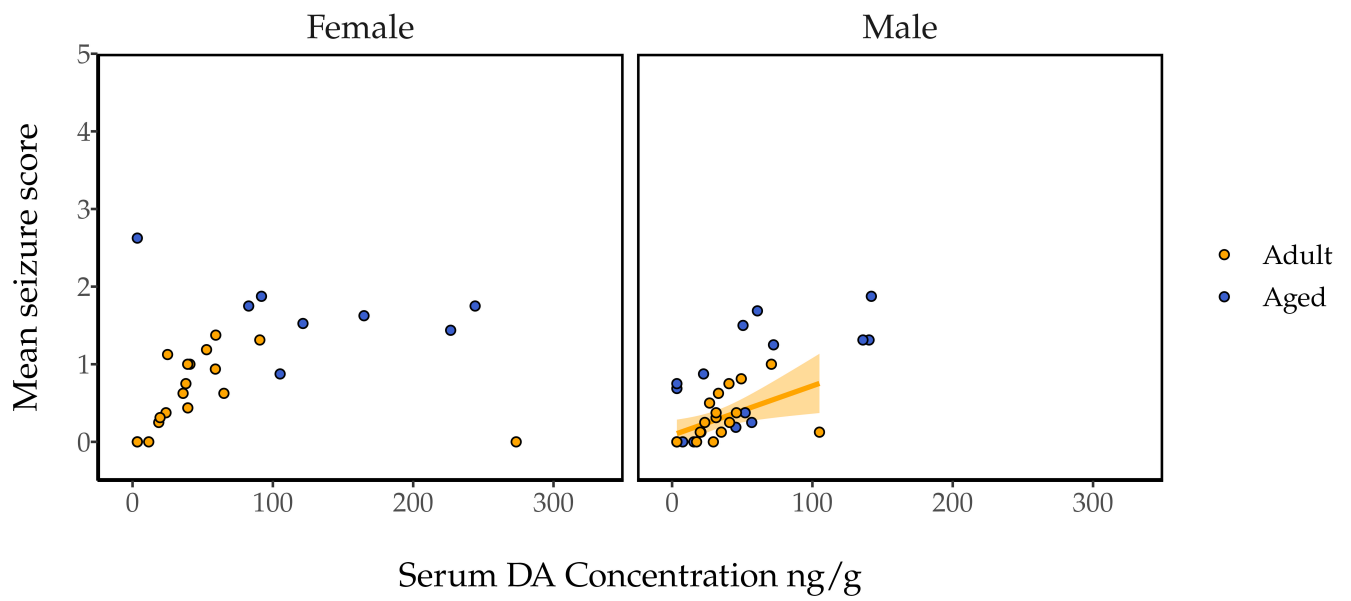

**Figure S1.** Regression analyses of mean seizure score versus serum domoic acid (DA) concentrations indicated that serum DA level was positively associated with mean seizure score in adult male mice only. Overall linear regression model for adult male mice was statistically significant ( $F(1, 18) = 6.51, p = 0.020$ ). For every 100 ng/g greater serum DA concentration, mean seizure score increased by 0.64 ( $\pm 0.25; p = 0.020$ ).
